# Supplementary material
Source: HighWire-hosted journal article supplement (https://bmjopen.bmj.com/content/15/5/e087340)
Supplement: inline-supplementary-material-5 [file inline-supplementary-material-5.pdf]

Summary of findings:

Cupping Therapy compared to placebo for chronic musculoskeletal pain

**Patient or population:** chronic musculoskeletal pain  
**Setting:**  
**Intervention:** Cupping Therapy  
**Comparison:** placebo

| Outcomes              | Anticipated absolute effects*<br>(95% CI) |                                                             | Relative effect<br>(95% CI) | N <sub>o</sub> of<br>participants<br>(studies) | Certainty of<br>the evidence<br>(GRADE) | Comments |
|-----------------------|-------------------------------------------|-------------------------------------------------------------|-----------------------------|------------------------------------------------|-----------------------------------------|----------|
|                       | Risk with<br>placebo                      | Risk with<br>Cupping<br>Therapy                             |                             |                                                |                                         |          |
| pain intensity        | -                                         | SMD <b>1.17<br/>lower</b><br>(1.93 lower to<br>0.42 lower)  | -                           | 656<br>(10 RCTs)                               | ⊕⊕⊕○<br>Moderate <sup>a</sup>           |          |
| mental health         | -                                         | SMD <b>0.12<br/>higher</b><br>(0.07 lower to<br>0.3 higher) | -                           | 446<br>(7 RCTs)                                | ⊕⊕⊕⊕<br>High                            |          |
| functional disability | -                                         | SMD <b>0.24<br/>lower</b><br>(0.93 lower to<br>0.46 higher) | -                           | 596<br>(9 RCTs)                                | ⊕⊕⊕○<br>Moderate <sup>b</sup>           |          |

\*The risk in the intervention group (and its 95% confidence interval) is based on the assumed risk in the comparison group and the **relative effect** of the intervention (and its 95% CI).

CI: confidence interval; SMD: standardised mean difference

**GRADE Working Group grades of evidence**  
**High certainty:** we are very confident that the true effect lies close to that of the estimate of the effect.  
**Moderate certainty:** we are moderately confident in the effect estimate: the true effect is likely to be close to the estimate of the effect, but there is a possibility that it is substantially different.  
**Low certainty:** our confidence in the effect estimate is limited: the true effect may be substantially different from the estimate of the effect.  
**Very low certainty:** we have very little confidence in the effect estimate: the true effect is likely to be substantially different from the estimate of effect.

Explanations

- a. I<sup>2</sup> = 94%
- b. I<sup>2</sup> = 93%
